# New Titles to Help You Treat Substance Abuse

## Clinical Manual of Adolescent Substance Abuse Treatment

Edited by Yifrah Kaminer, M.D., M.B.A., and Ken C. Winters, Ph.D.

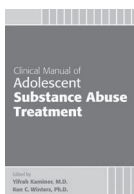

*Clinical Manual of Adolescent Substance Abuse Treatment* brings together extensive new research in the field of adolescent substance abuse to serve as a comprehensive resource for psychiatrists, psychologists, social workers, substance abuse specialists, and other clinicians, as well as residents and students of psychology. It provides the most recent information about adolescent substance abuse assessment, prevention and treatment. Special emphasis is given to different psychosocial and pharmacological interventions in addition to the treatment of various coexisting psychiatric disorders.

Readers will find this manual a valuable resource in furthering their understanding of adolescent substance abuse and increasing their effectiveness in providing treatment.

2011 • 518 pages • ISBN 978-1-58562-381-5 • Paperback \$65.00 • Item #62381

## Handbook of Office-Based Buprenorphine Treatment of Opioid Dependence

John A. Renner, Jr., M.D., and Petros Levounis, M.D., M.A.

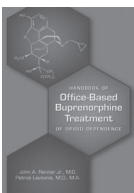

This book will serve as a reliable guide for the addition of buprenorphine treatment into existing clinical practices, both for psychiatrists and other clinicians. The potential to improve the lives of patients with the disease of opioid addiction is great, and this book offers concrete and practical advice for managing patients in an office-based setting.

2011 • 357 pages • ISBN 978-1-58562-369-3 • Paperback \$59.00 • Item #62369

## Clinical Manual for Treatment of Alcoholism and Addictions

Avram H. Mack, M.D., Amy L. Harrington, M.D., and Richard J. Frances, M.D.

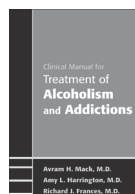

*The Clinical Manual for Treatment of Alcoholism and Addictions* provides a concise overview of addiction treatment issues relevant to clinicians who are involved in the care of patients with substance use disorders.

This clinical manual consolidates a wealth of information into one easy-to-read guide. In addition to covering specific addictive substances in detail—including epidemiology, presentation, and diagnosis, as well as polysubstance abuse and psychiatric comorbidity, the manual also addresses underlying issues related to specific patient populations, such as children and adolescents, seniors, and the mentally and physically handicapped.

*The Clinical Manual for Treatment of Alcoholism and Addictions* is an invaluable tool for informing clinicians about the wide array of treatment options available to help their patients who struggle with substance abuse problems.

2010 • 304 pages • ISBN 978-1-58562-373-0 • Paperback \$55.00 • Item #62373

## Handbook of Motivation and Change

A Practical Guide for Clinicians

Edited by Petros Levounis, M.D., M.A., and Bachaar Arnaout, M.D.

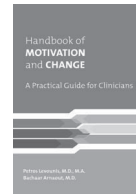

*Handbook of Motivation and Change: A Practical Guide for Clinicians* is a busy clinician's guide to motivational interviewing. With a special focus on substance use disorders and addiction, this unique handbook equips readers with a full understanding of the Motivational Interviewing approach—an understanding that readers can flexibly apply to address patients' issues of motivation and change even beyond substance use.

The handbook is written by more than 20 practitioners of different psychotherapies who employ motivational work. Authors focus on interventions ranging from psychopharmacology to support groups, zero in on the unique challenges of treating patients at various stages of their lives, examine how motivational work can change a culture, and discuss the evidence base of this effective and compelling therapy.

2010 • 316 pages • ISBN 978-1-58562-370-9 • Paperback \$54.00 • Item #62370

### Also available

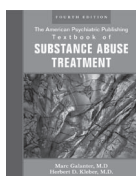

## The American Psychiatric Publishing Textbook of Substance Abuse Treatment, Fourth Edition

Edited by Marc Galanter, M.D., and Herbert D. Kleber, M.D.

2008 • 770 pages • ISBN 978-1-58562-276-4 • Hardcover • \$185.00 • Item #62276

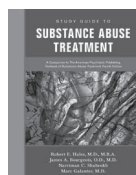

## Study Guide to Substance Abuse Treatment

A Companion to The American Psychiatric Publishing Textbook of Substance Abuse Treatment, Fourth Edition

Robert E. Hales, M.D., M.B.A., James A. Bourgeois, O.D., M.D., Narriman C. Shahrokh, and Marc Galanter, M.D.

2008 • 262 pages • ISBN 978-1-58562-339-6 • Paperback • \$54.00 • Item #62339

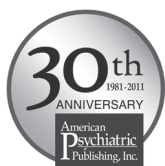

The First and Last Word in Psychiatry

[www.appi.org](http://www.appi.org)

Phone: 1-800-368-5777 • Email: [appi@psych.org](mailto:appi@psych.org)

Priority code AH1111

Find us on and

20% Discount For American Psychiatric Association Members!

25% Discount For APA Members-in-Training
