# FOCUS

THE JOURNAL OF LIFELONG LEARNING IN PSYCHIATRY

## *Addiction: Current and Future Treatments*

*Guest Editor, Joyce A. Tinsley, M.D.*

### IN CLINICAL SYNTHESIS:

Assessment and Treatment of  
Substance Use Disorders

*Joyce A. Tinsley, M.D.*

The Clinical Assessment and Treatment of  
Nicotine Dependence

*Itai Danovitch, M.D.*

Vaccines in the Treatment of  
Substance Abuse

*Daryl Shorter, M.D.*

*Thomas R. Kosten, M.D.*

Performance in Practice:  
Physician Practice Assessment Tools for the  
Screening, Assessment, and Treatment of  
Adults with Substance Use Disorder

*Farifteh F. Duffy, Ph.D.*

Motivational Interviewing and Psychiatry:  
Use in Addiction Treatment, Risky  
Drinking and Routine Practice

*Steven Cole, M.D.*

AND INFLUENTIAL PUBLICATIONS . . .
